# Supplementary material for: TGF-β/activin signaling promotes CDK7 inhibitor resistance in triple-negative breast cancer cells through upregulation of multidrug transporters
Source: PubMed Central journal article supplement — J Biol Chem. 2021 Sep 2;297(4):101162. doi: 10.1016/j.jbc.2021.101162 (PMC8498470; doi:10.1016/j.jbc.2021.101162), 2021-09-02
Supplement: mmc2.pdf [file mmc2.pdf]

# Supporting Figure 1

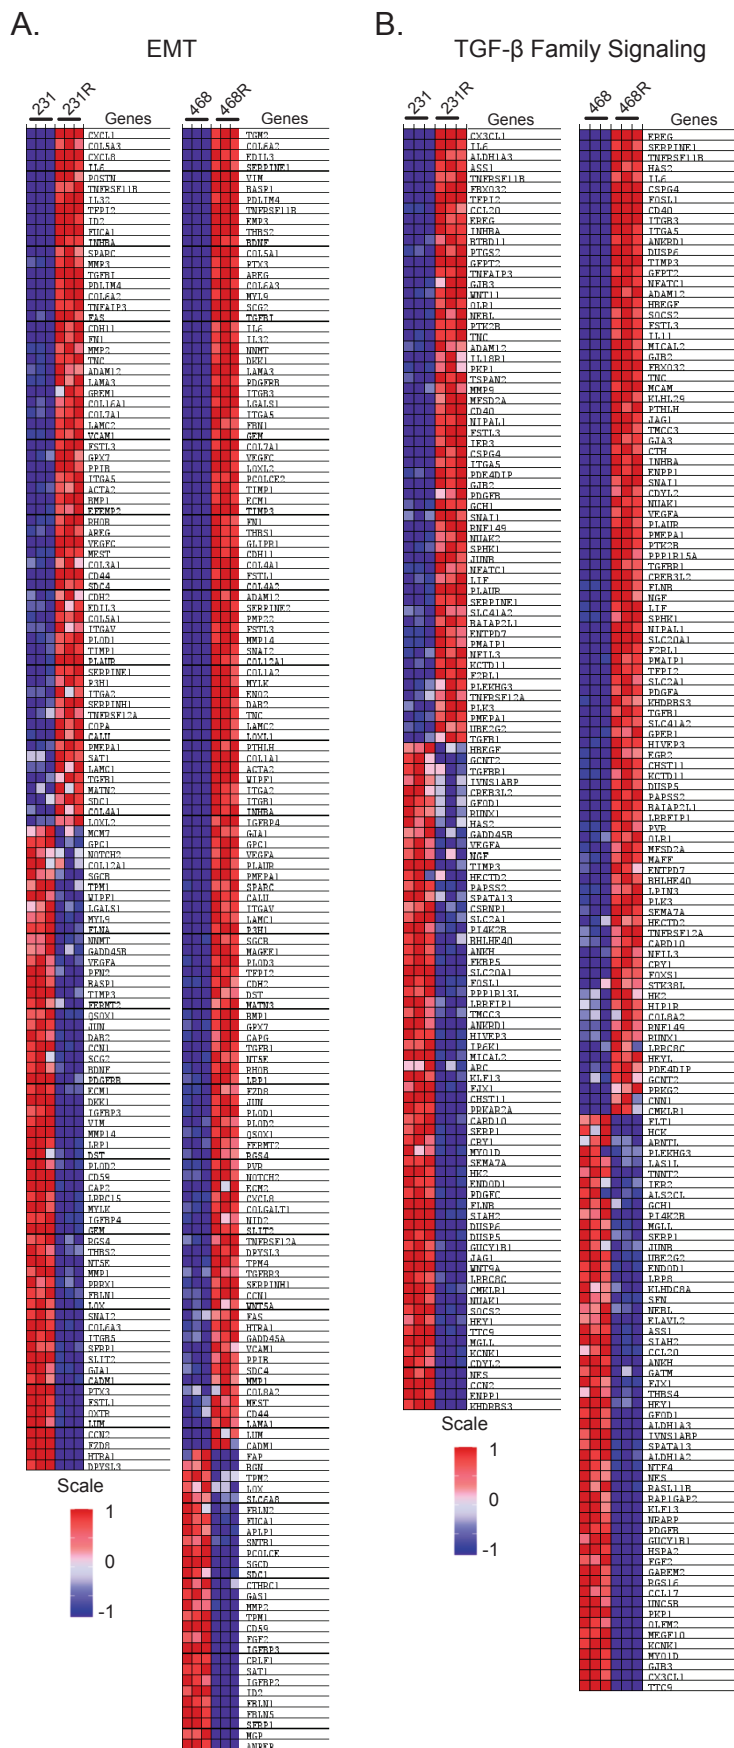

**Figure S1. GSEA Heatmaps of enriched pathways in the CDK7i sensitive and resistant cells**  
 A. Heatmaps of the RNA-Seq gene expression data showing gene lists for A) EMT and B) TGF- $\beta$  signaling pathways. Triplicates were conducted for each sample and are indicated in the heatmap.

## Supporting Table 2

| Matrix ID | Name                | Score   | Relative score | Sequence ID | Start    | End      | Strand | Predicted sequence |
|-----------|---------------------|---------|----------------|-------------|----------|----------|--------|--------------------|
| MA1622.1  | Smad2::Smad3        | 14.6973 | 0.9728754573   | hg19_dna    | 89146815 | 89146828 | -      | GTCATGACTCATAT     |
| MA1622.1  | Smad2::Smad3        | 12.39   | 0.9285241048   | hg19_dna    | 89146814 | 89146827 | +      | CATATGAGTCATGA     |
| MA0513.1  | SMAD2::SMAD3::SMAD4 | 11.4584 | 0.8718875118   | hg19_dna    | 89146736 | 89146748 | -      | CAGTCTACCTCCT      |
| MA1622.1  | Smad2::Smad3        | 8.56862 | 0.8550692505   | hg19_dna    | 89147144 | 89147157 | -      | TAATTGAATCATGG     |
| MA1622.1  | Smad2::Smad3        | 7.93718 | 0.8429317084   | hg19_dna    | 89146377 | 89146390 | +      | GTCATGACTCCTCT     |
| MA1622.1  | Smad2::Smad3        | 7.81807 | 0.8406421916   | hg19_dna    | 89146371 | 89146384 | -      | GTCATGACACAGCC     |
| MA1622.1  | Smad2::Smad3        | 7.76443 | 0.839611053    | hg19_dna    | 89147143 | 89147156 | +      | CCCATGATTCAATT     |
| MA0513.1  | SMAD2::SMAD3::SMAD4 | 8.6866  | 0.8266497602   | hg19_dna    | 89147484 | 89147496 | -      | TGGGCTGTCAGCT      |
| MA1622.1  | Smad2::Smad3        | 5.91097 | 0.8039834716   | hg19_dna    | 89146378 | 89146391 | -      | TAGAGGAGTCATGA     |
| MA0513.1  | SMAD2::SMAD3::SMAD4 | 7.17641 | 0.8020026793   | hg19_dna    | 89146324 | 89146336 | -      | CTATCTGGCCCTT      |
| MA0513.1  | SMAD2::SMAD3::SMAD4 | 7.11024 | 0.8009226146   | hg19_dna    | 89147482 | 89147494 | +      | CTAGCTGACAGCC      |

**Supporting Table 2. Predicted SMAD2/SMAD3/SMAD4 binding to the ABCG2 gene locus.**
